# Supplementary material for: Preparation of Photocrosslinked Fish Elastin Polypeptide/Microfibrillated Cellulose Composite Gels with Elastic Properties for Biomaterial Applications
Source: MDPI journal article supplement (doi:10.3390/md13010338), 2015-01-09
Supplement: s1 [file s1]

## Supplementary Information

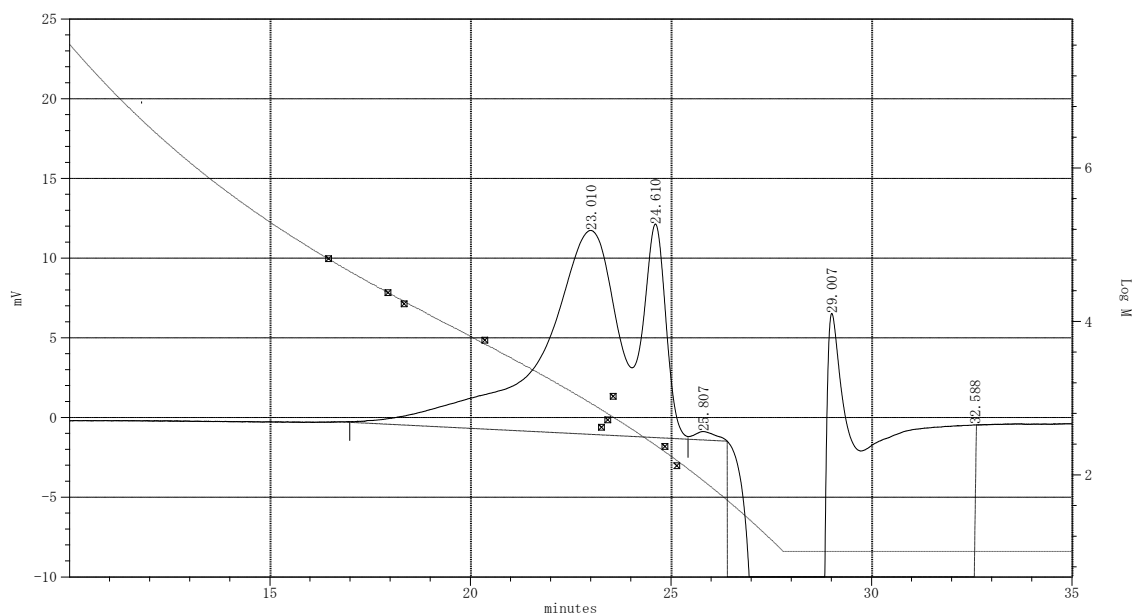

**Figure S1.** GPC profile of ElaPep supplied by Hayashikane Sangyo Co., Ltd. ElaPep was obtained by enzymatic extraction from the bulbus arteriosus of skipjacks.  $M_n = 500$ ,  $M_w = 1900$ .

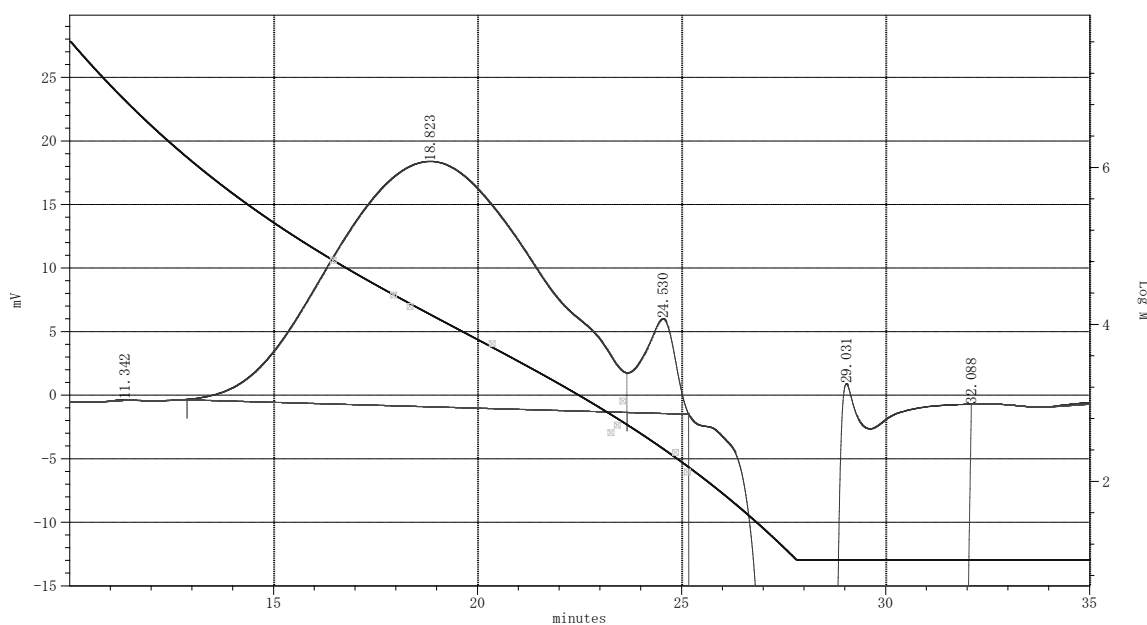

**Figure S2.** GPC profile of ElaPoly (the product of the polymerization of ElaPep).  $M_n = 6200$ ,  $M_w = 26,000$ .
